# Supplementary material
Source: PubMed Central journal article supplement (PMC6463711)
Supplement: supp_RA118.007049_142435_2_supp_282816_pmk258.pdf [file supp_RA118.007049_142435_2_supp_282816_pmk258.pdf]

## Supporting information

### **Cyclins B1, T1 and H differ in their molecular mode of interaction with cytomegalovirus protein kinase pUL97**

**Mirjam Steingruber<sup>1\*</sup>, Lena Keller<sup>1</sup>, Eileen Socher<sup>2</sup>, Sabrina Ferre<sup>3</sup>, Anne-Marie Hesse<sup>3</sup>, Yohann Couté<sup>3</sup>, Friedrich Hahn<sup>1</sup>, Nicole Büscher<sup>4</sup>, Bodo Plachter<sup>4</sup>, Heinrich Sticht<sup>2\*</sup>, Manfred Marschall<sup>1\*</sup>**

<sup>1</sup>Institute for Clinical and Molecular Virology, Friedrich-Alexander University of Erlangen-Nürnberg (FAU), Erlangen, Germany;

<sup>2</sup>Division of Bioinformatics, Institute of Biochemistry, FAU, Erlangen, Germany;

<sup>3</sup>Univ. Grenoble Alpes, CEA, Inserm, BIG-BGE, 38000 Grenoble, France;

<sup>4</sup>Institute for Virology, University Medical Center of the Johannes Gutenberg-University Mainz, Mainz, Germany

Running title: *Differential mode of cyclins' interaction with vCDK pUL97*

\*

To whom correspondence should be addressed: M. Marschall, M. Steingruber and H. Sticht  
Email: manfred.marschall@fau.de, mirjam.steingruber@uk-erlangen.de, heinrich.sticht@fau.de

#### Contents

#### **Supplemental Table S1**

Mass spectrometry data of pUL97 phosphosites from Analyses I and II as presented in Table 3.

**Table S1****Mass spectrometry raw data of pUL97 phosphosites from Analyses I and II as presented in Table 3**

Samples for Analysis I were prepared from HFF cells infected with HCMV AD169 for 5 days. Six 175 cm<sup>2</sup> flasks per sample were harvested and used for upscaling pUL97-IP. IP samples have been used for two runs of phosphosite mass spectrometry analysis, virion-derived pUL97. Samples for Analysis II were prepared from gradient-purified HCMV AD169 HB15 or UL97ΔK355 virions, respectively.

| <b>Analysis I</b>              |              |                        |                |                 |
|--------------------------------|--------------|------------------------|----------------|-----------------|
| <b>Run I</b>                   |              |                        |                |                 |
| <b>pUL97 Peptide</b>           | <b>Score</b> | <b>PTM Probability</b> | <b>Residue</b> | <b>Prot Loc</b> |
| AAGEQQQPPSLVGTGVHR             | 70,06        | 99,84321               | S              | 386             |
| GSAASGDGYHGLR                  | 69,93        | 99,743026              | S              | 142             |
| ALFTGGSDPDSVSGVR               | 121,91       | 99,47842               | S              | 180             |
| ALFTGGSDPDSVSGVR               | 85,43        | 99,19151               | T              | 177             |
| ALFTGGSDPDSVSGVR               | 85,43        | 99,19151               | S              | 180             |
| ALFTGGSDPDSVSGVRGGR            | 58,52        | 98,94308               | S              | 180             |
| RALFTGGSDPDSVSGVR              | 46,49        | 96,70893               | T              | 177             |
| RALFTGGSDPDSVSGVR              | 46,49        | 96,70893               | S              | 180             |
| RALFTGGSDPDSVSGVR              | 56,16        | 89,25548               | S              | 180             |
| ALFTGGSDPDSVSGVR               | 58,23        | 72,14349               | S              | 185             |
| ALFTGGSDPDSVSGVR               | 58,23        | 72,14349               | S              | 180             |
| VGGVDAVLEENDVELRAESQDSAVASGPGR | 66,88        | 39,342076              | S              | 239             |
| ALFTGGSDPDSVSGVRGGR            | 31,03        | 35,443994              | S              | 187             |
| ALFTGGSDPDSVSGVRGGR            | 31,03        | 35,443994              | T              | 177             |
| RPVVPSTSSRGSAAASGDGYHGLR       | 36,88        | 19,636643              | S              | 133             |

  

| <b>Run II</b>        |              |                        |                |                 |
|----------------------|--------------|------------------------|----------------|-----------------|
| <b>pUL97 Peptide</b> | <b>Score</b> | <b>PTM Probability</b> | <b>Residue</b> | <b>ProtLoc.</b> |
| DGEKEDAASDKENLR      | 105,6        | 100                    | S              | 121             |
| GSAASGDGYHGLR        | 74,92        | 100                    | S              | 139             |
| GSAASGDGYHGLR        | 74,92        | 100                    | S              | 142             |
| ALFTGGSDPDSVSGVR     | 144,29       | 99,99815               | S              | 180             |
| AESQDSAVASGPGR       | 51,1         | 99,964035              | S              | 239             |
| RALFTGGSDPDSVSGVR    | 144,6        | 99,90375               | S              | 180             |
| ALFTGGSDPDSVSGVRGGR  | 80,82        | 99,90005               | S              | 180             |
| AESQDSAVASGPGR       | 85,83        | 99,819547              | S              | 232             |
| AAGEQQQPPSLVGTGVHR   | 69,07        | 99,70235               | S              | 386             |
| GSAASGDGYHGLR        | 122,12       | 99,681854              | S              | 142             |
| RALFTGGSDPDSVSGVR    | 101          | 97,61795               | T              | 177             |
| RALFTGGSDPDSVSGVR    | 101          | 97,61795               | S              | 180             |
| ALFTGGSDPDSVSGVR     | 122,18       | 96,13632               | T              | 177             |
| ALFTGGSDPDSVSGVR     | 122,18       | 96,13632               | S              | 180             |

|                          |        |           |   |     |
|--------------------------|--------|-----------|---|-----|
| ALFTGGSDPSDSVSGVRGGR     | 67,97  | 94,74132  | T | 177 |
| ALFTGGSDPSDSVSGVRGGR     | 67,97  | 94,74132  | S | 180 |
| SASLGTTTQGWDPPLR         | 112,42 | 89,81314  | S | 13  |
| RPVVPSTSSR               | 66,86  | 88,700634 | S | 135 |
| SASLGTTTQGWDPPLRRPSR     | 44,88  | 86,84324  | S | 13  |
| ALFTGGSDPSDSVSGVR        | 108,3  | 77,43492  | T | 177 |
| ALFTGGSDPSDSVSGVR        | 108,3  | 77,43492  | S | 183 |
| RPVVPSTSSRGSAAASGDGYHGLR | 67,56  | 74,8651   | S | 139 |
| RPVVPSTSSRGSAAASGDGYHGLR | 67,56  | 74,8651   | S | 142 |
| CVAVFQETGTAR             | 38,44  | 74,297535 | T | 504 |
| ALFTGGSDPSDSVSGVR        | 130,3  | 70,99193  | T | 177 |
| RALFTGGSDPSDSVSGVRGGR    | 25,55  | 69,59055  | S | 180 |
| RPVVPSTSSRGSAAASGDGYHGLR | 81,7   | 49,894965 | S | 142 |
| RPVVPSTSSRGSAAASGDGYHGLR | 81,7   | 49,894965 | S | 139 |
| RPVVPSTSSRGSAAASGDGYHGLR | 81,7   | 49,894965 | S | 133 |
| ALFTGGSDPSDSVSGVRGGR     | 80,63  | 49,750978 | S | 185 |
| ALFTGGSDPSDSVSGVRGGR     | 80,63  | 49,750978 | S | 180 |
| ALFTGGSDPSDSVSGVRGGR     | 26,26  | 47,008517 | S | 185 |
| RPVVPSTSSRGSAAASGDGYHGLR | 82,31  | 40,128493 | S | 139 |
| RPVVPSTSSRGSAAASGDGYHGLR | 82,31  | 40,128493 | S | 136 |
| RPVVPSTSSRGSAAASGDGYHGLR | 71,25  | 21,381325 | S | 133 |

## Analysis II

### HB15 wild-type

| pUL97 Peptide     | Score  | PTM Probability | Residue | ProtLoc. |
|-------------------|--------|-----------------|---------|----------|
| DGEKEDAASDKENLR   | 88,29  | 100             | S       | 121      |
| GSAASGDGYHGLR     | 113,86 | 99,99875        | S       | 142      |
| ALFTGGSDPSDSVSGVR | 137,68 | 99,885895       | S       | 180      |
| ALFTGGSDPSDSVSGVR | 106,98 | 98,7356         | S       | 185      |
| SASLGTTTQGWDPPLR  | 83,86  | 52,892834       | S       | 13       |

### UL97ΔK355

| pUL97 Peptide   | Score | PTM Probability | Residue | ProtLoc. |
|-----------------|-------|-----------------|---------|----------|
| DGEKEDAASDKENLR | 80,04 | 100             | S       | 121      |
